# Supplementary material for: The Interaction of Methyl Formate with Proton-Bound Solvent Clusters in the Gas Phase and the Unimolecular Chemistry of the Reaction Products
Source: MDPI journal article supplement (doi:10.3390/app13031339), 2023-01-19
Supplement: s1 [file s1]

Archive with 1 entries (1 files):
- applsci-2139571-supplementary.pdf
