# Supplementary material for: The Interaction of Methyl Formate with Proton-Bound Solvent Clusters in the Gas Phase and the Unimolecular Chemistry of the Reaction Products
Source: MDPI journal article supplement (doi:10.3390/app13031339), 2023-01-19
Supplement: s1 [file s1 › applsci-2139571-supplementary.pdf]

# The Interaction of Methyl Formate with Proton-bound Solvent Clusters in the Gas Phase and the Unimolecular Chemistry of the Reaction Products

Malick Diedhiou and Paul M Mayer\*

Department of Chemistry and Biomolecular Sciences, University of Ottawa, Ottawa Canada K1N  
6N5

\*Corresponding author. Paul M Mayer [pmmayer@uottawa.ca](mailto:pmmayer@uottawa.ca)

Supporting Information

Table S1. Additional reactions observed in the ion-molecule reactions explored in this study.

Energies calculated at the B3LYP/6-311+G(d,p) level of theory.

|                                                                          |                               |
|--------------------------------------------------------------------------|-------------------------------|
| $(W)_3H^+ (m/z\ 55) \rightarrow (W)_2H^+ (m/z\ 37) + W$                  | $\Delta E = 0.95\ \text{eV}$  |
| $(MF)H^+ (m/z\ 61) + MF (m/z\ 60) \rightarrow (MF)_2H^+ (m/z\ 121)$      | $\Delta E = -1.34\ \text{eV}$ |
| $(MF)_2H^+ (m/z\ 121) + E (m/z\ 46) \rightarrow (MF)_2(E)H^+ (m/z\ 167)$ | $\Delta E = -0.86\ \text{eV}$ |
| $(E)_3H^+ (m/z\ 139) \rightarrow (E)_2H^+ (m/z\ 93) + E$                 | $\Delta E = 0.83\ \text{eV}$  |

Water = W, methanol = M, ethanol = E, and methyl formate = MF

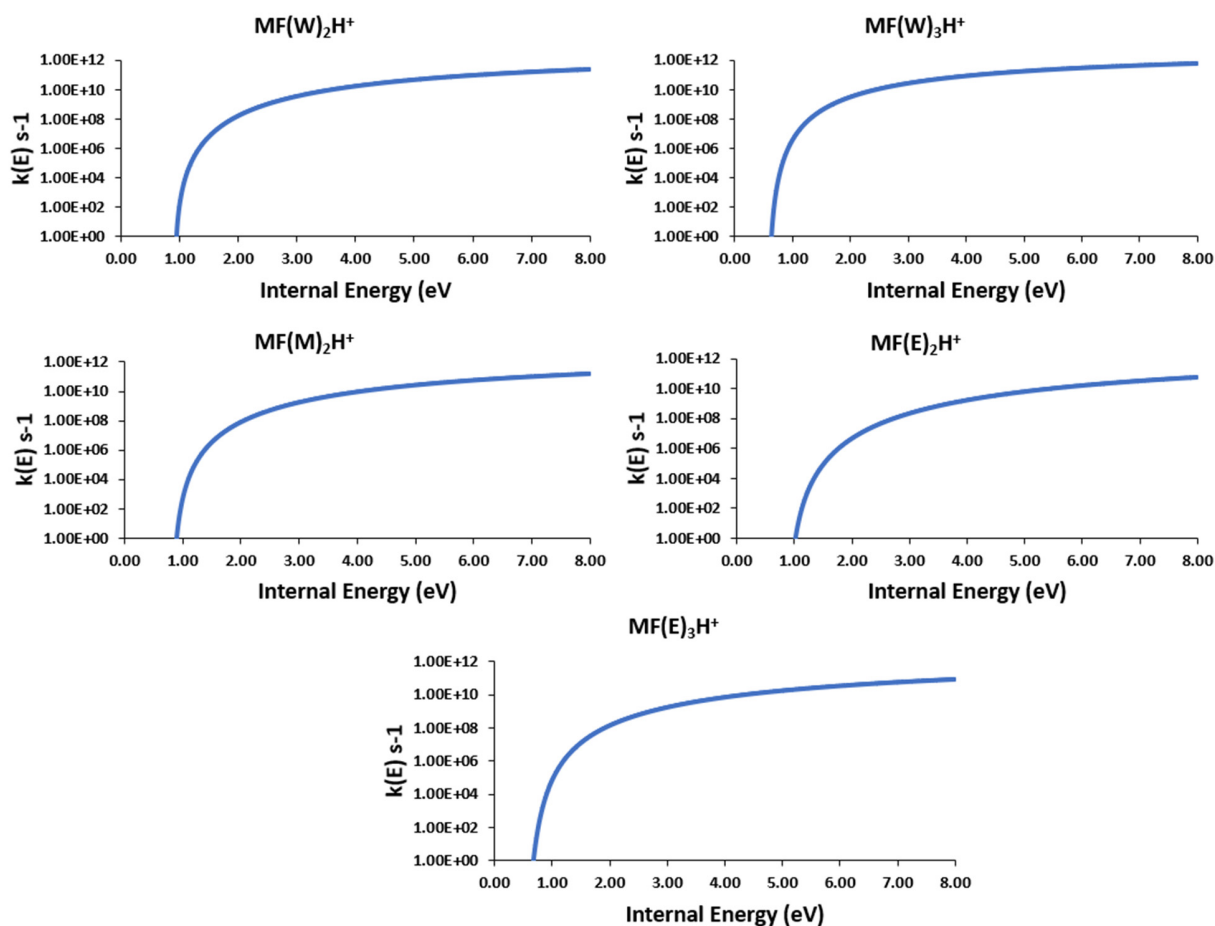

Figure S1. RRKM  $k(E)$  vs  $E$  curves for the dissociation of the ion-molecule encounter complexes

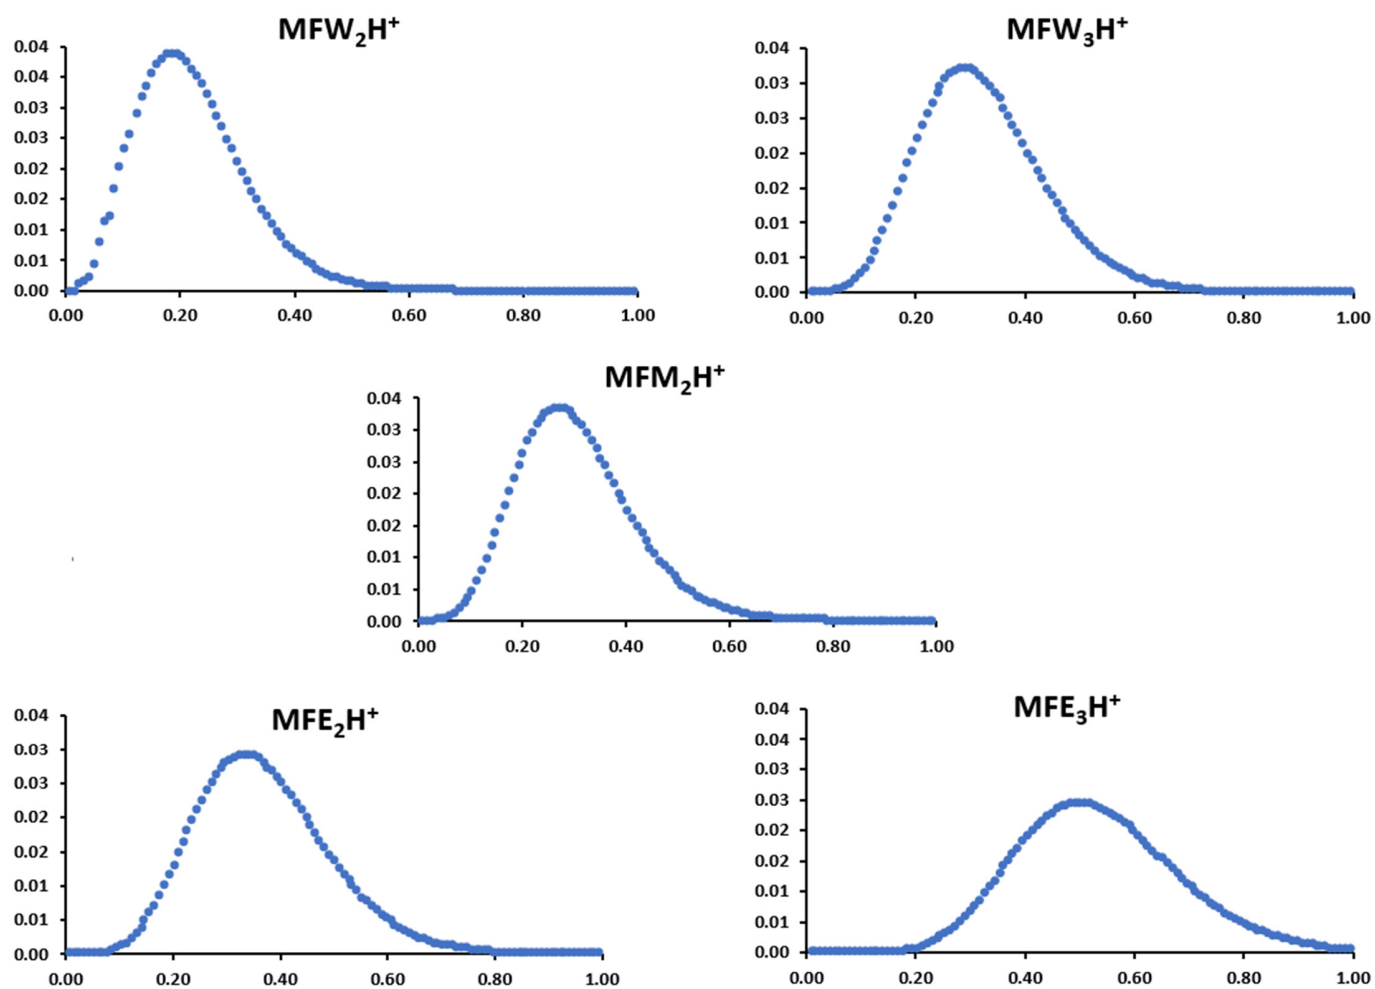

Figure S2. Vibrational internal energy distributions at 300 K for the encounter complexes in R1-R5.

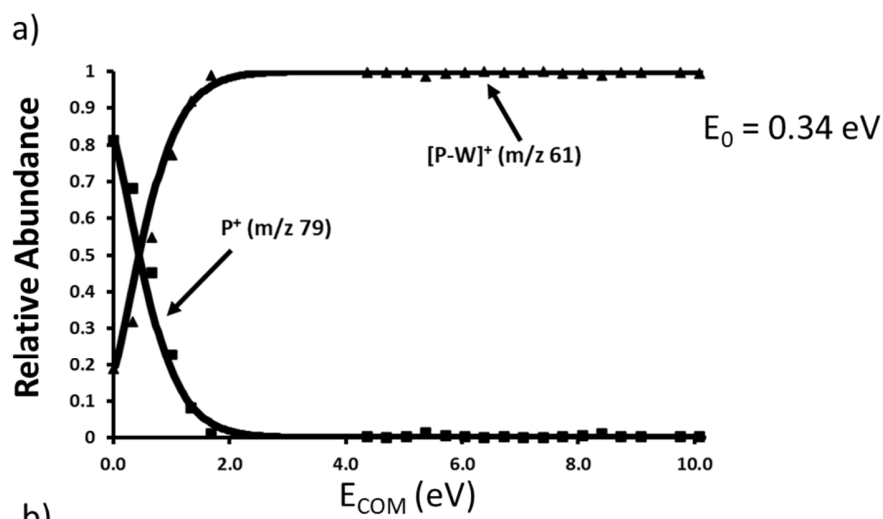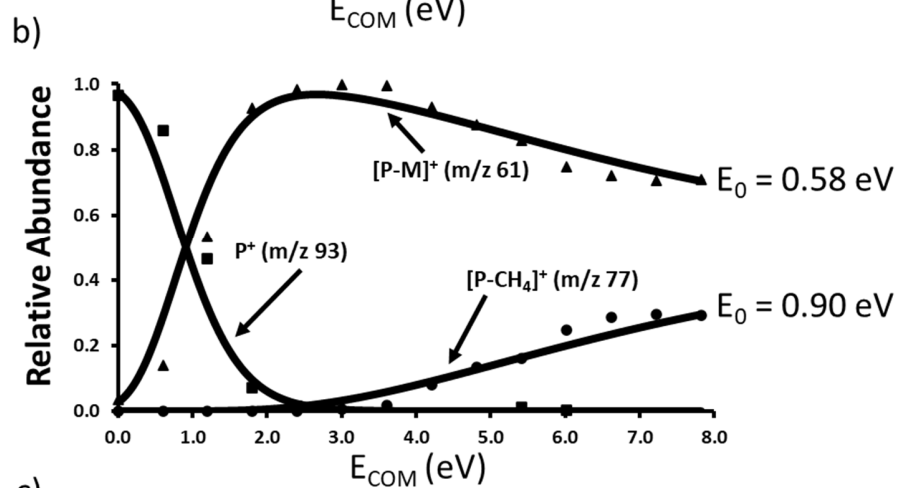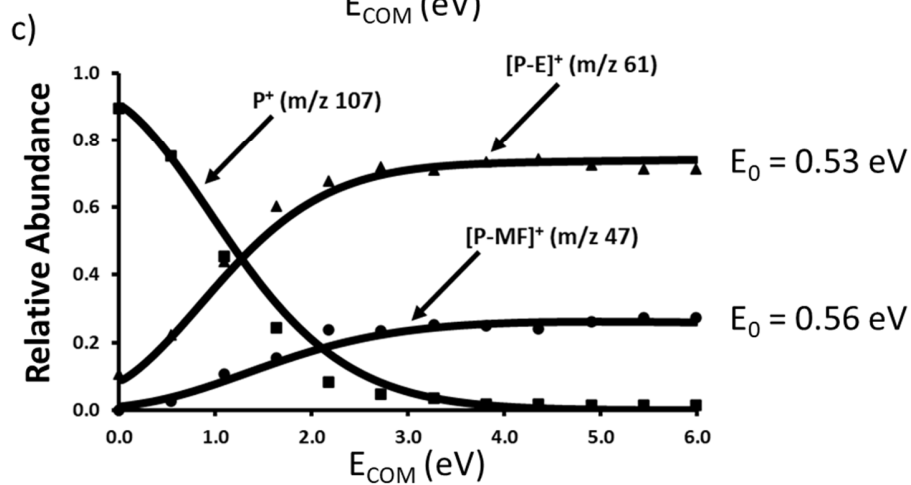

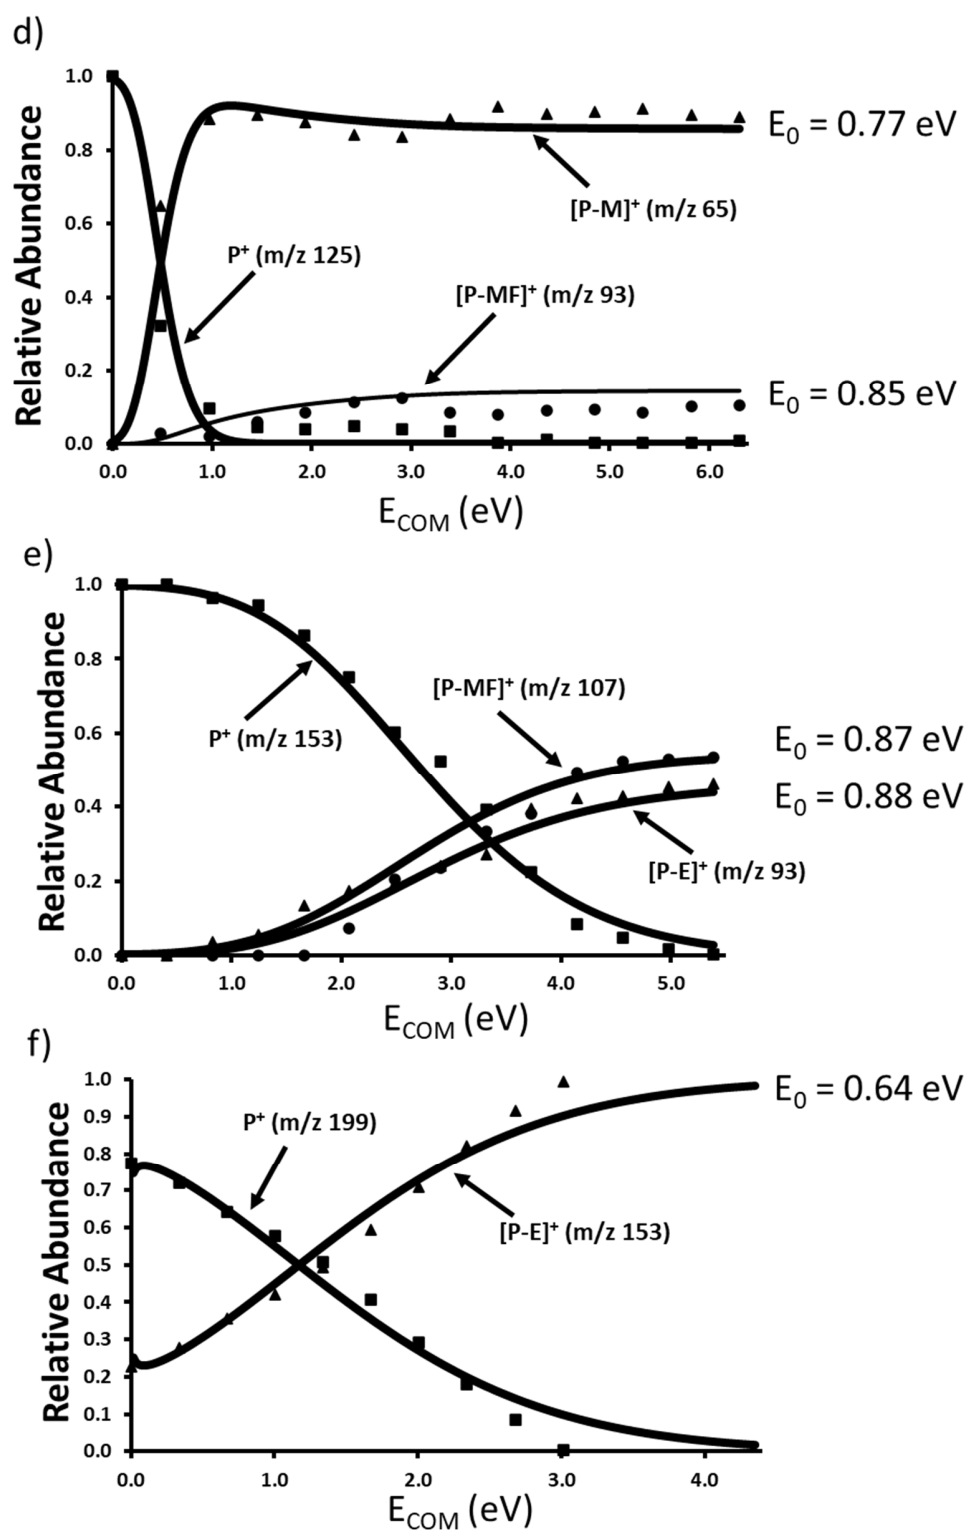

Figure S3. RRKM modeled breakdown curves for reactions in Figures 3 and 4. To accommodate the model, sequential reactions (such as loss of  $H_2O$  from  $m/z$  33 in Figure 3a) were summed into the primary product ion abundance.
